# Supplementary material for: Response of CH 4 emissions to moss removal and N addition in boreal peatland of northeast China
Source: Copernicus journal article supplement (doi:10.5194/bg-11-4809-2014), 2014-09-11
Supplement: Supplementary file 1 [file bg-11-4809-2014-supplement.pdf]

Supplement of Biogeosciences, 11, 4809–4816, 2014  
<http://www.biogeosciences.net/11/4809/2014/>  
doi:10.5194/bg-11-4809-2014-supplement  
© Author(s) 2014. CC Attribution 3.0 License.

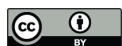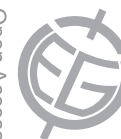

*Supplement of*

## **Response of CH<sub>4</sub> emissions to moss removal and N addition in boreal peatland of northeast China**

**H. N. Meng et al.**

*Correspondence to:* C. C. Song (songcc@iga.ac.cn)

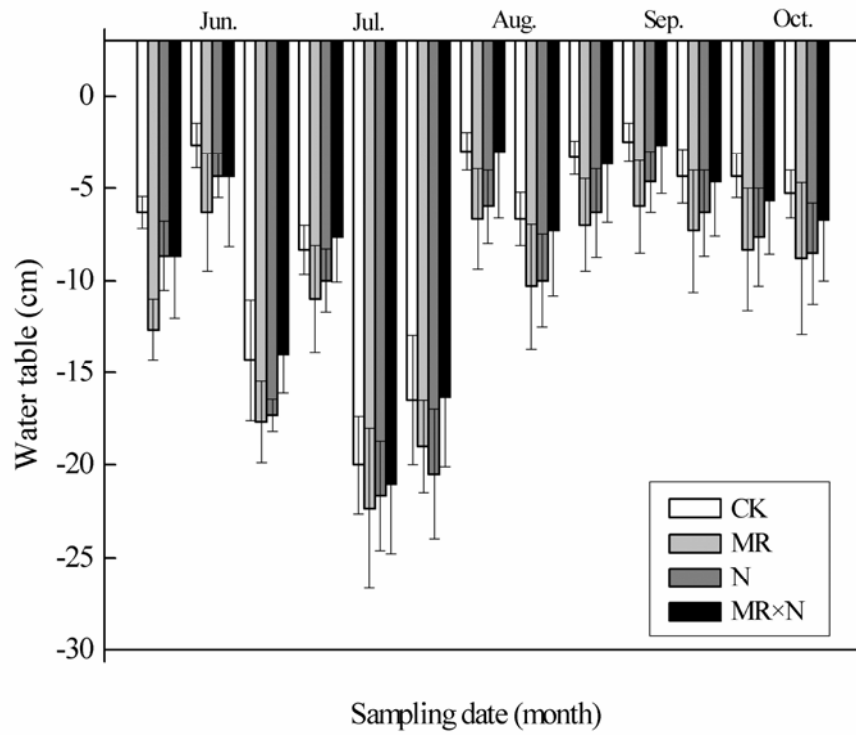

Figure. Temporal dynamics of water table during the growing seasons in 2012

Data are daily averages for per treatment ( $\pm$ SE,  $n = 3$ ).

CK, control; MR, moss removal; N, N addition; MR×N, moss removal plus N addition
